# Supplementary material for: The evolutionary modifications of a GoLoco motif in the AGS protein facilitate micromere formation in the sea urchin embryo
Source: eLife journal article supplement (doi:10.7554/elife.100086), 2024-08-21
Supplement: fig7-figsupp1-data1 [file elife-100086-fig7-figsupp1-data1-v1.zip]

SplNSC #1  
rabbit, polyclonal

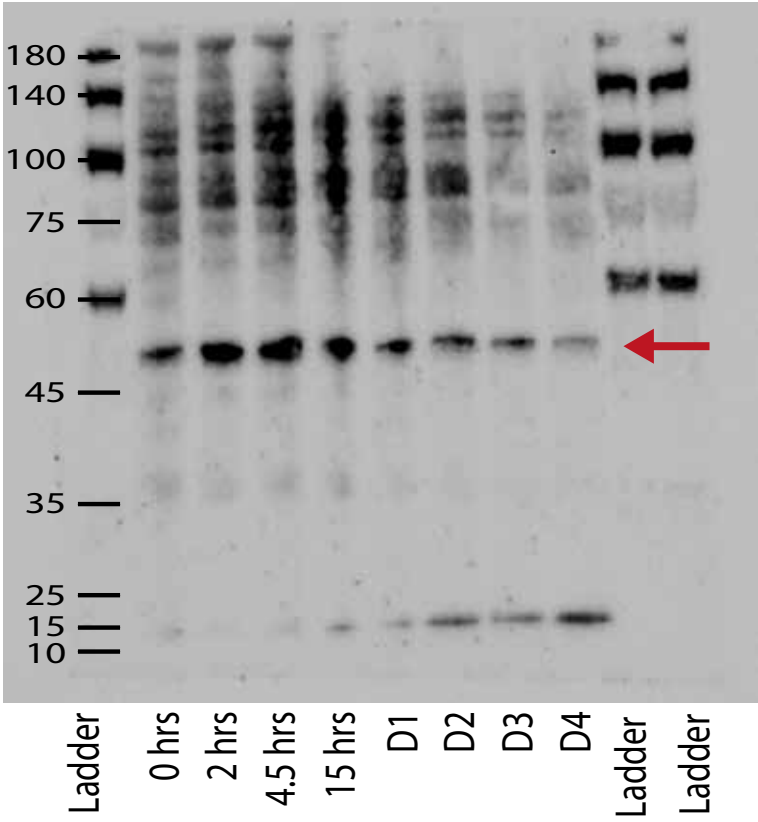

Actin  
mouse, monoclonal

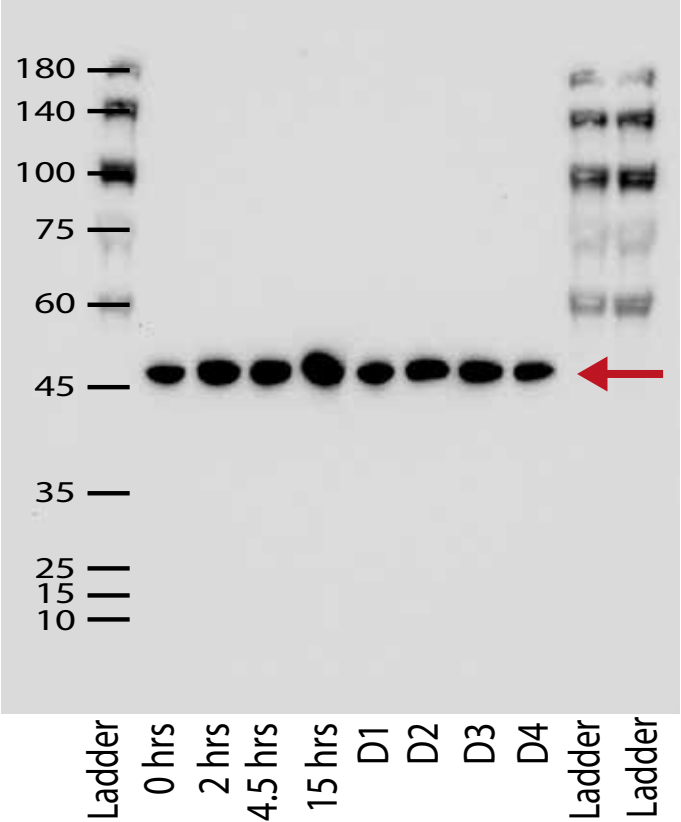

**Figure 7 - Supplement 1B, Source Data 2.** Original blots corresponding to Figure 7 - Supplement 1B. Splnsc is depicted on the left blot and Actin on the right blot. Red arrows indicate the main expected size.
