# Supplementary material for: The evolutionary modifications of a GoLoco motif in the AGS protein facilitate micromere formation in the sea urchin embryo
Source: eLife journal article supplement (doi:10.7554/elife.100086), 2024-08-21

IB from 3-19-21  
Running: 200V, 170mA, 25 min.  
Transfer using iBlot machine

|                  |                       |
|------------------|-----------------------|
| a-Splnsc #1      | a-Splnsc #1 + Peptide |
| 53 kDa           | 53 kDa                |
| 1:3000, 1.5% BSA | 1:3000, 1.5% BSA      |
| Rabbit, poly     | Rabbit, poly          |

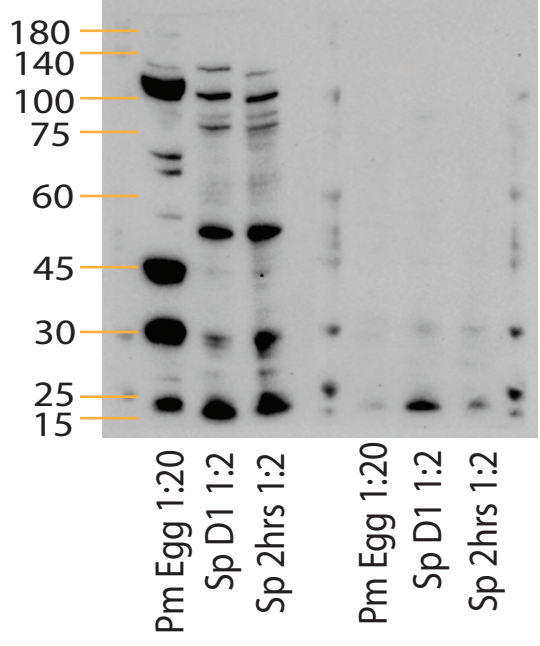

Supplement: fig7-figsupp1-data1 [file elife-100086-fig7-figsupp1-data1-v1.zip]
