# Supplementary material for: The evolutionary modifications of a GoLoco motif in the AGS protein facilitate micromere formation in the sea urchin embryo
Source: eLife. 2024 Dec 23;13:RP100086. doi: 10.7554/eLife.100086 (PMC11666239; doi:10.7554/eLife.100086)
Supplement: Figure 2—source data 1. [file elife-100086-fig2-data1.xlsx]

## Sheet: Sheet1
Figure 2 - Source Data 1
Figure 2C: Vegetal cortical localization at 16~32-cell stage
Fig2C	Percentage of embryos with vegetal cortical localization
Full AGS	AGS-F1	AGS-F2	AGS-F3
100	100	83	50
100	50	67	67
100	50	50	50
80	83	57	50
75
100
Fig2C	Vegetal cortex:Animal cortex mean intensity ratio
Full AGS	AGS-F1	AGS-F2	AGS-F3
1.51341	2.34167	0.953737	1.06929
1.43709	1.56	1.00245	1.34552
2.62762	1.38194	0.8111	1.18563
1.26118	2.32425	0.659062	0.937108
1.82907	1.68542	1.61864	0.783471
	0.970199	0.988946	0.946955
	1.45511	1.03946	0.964724
	1.68327	1.01599	1.06749
	1.29858
	2.08216
