# Supplementary material for: The evolutionary modifications of a GoLoco motif in the AGS protein facilitate micromere formation in the sea urchin embryo
Source: eLife. 2024 Dec 23;13:RP100086. doi: 10.7554/eLife.100086 (PMC11666239; doi:10.7554/eLife.100086)
Supplement: Figure 2—source data 2. [file elife-100086-fig2-data2.xlsx]

## Sheet: Sheet1
Figure 2 - Source Data 2
Figure 2E: Largest to smallest cell diameter ratio
Fig2E
Control	AGS-F1	AGS-F2	AGS-F3
1.90757	2.35917	2.93924	1.47589
1.86974	2.27984	1.65297	1.27052
2.33205	1.73627	2.2766	1.19751
1.41292	2.3948	1.80476	1.4263
2.82337	1.99986	2.30329	1.15911
3.5354	1.84041	1.53485	1.16057
2.17499	2.03384	1.69619	1.81826
1.95844	1.72471	1.73111	1.63884
2.44127	2.83735	1.29865	1.44049
2.68624	2.1063	1.12414	1.76796
2.03244	3.23283	2.38394	1.80171
1.66424	3.46641	1.55347	1.42861
2.4369	3.28514	1.59858	1.42363
2.65877	2.95055	1.71581	1.20693
2.74738	2.95265	1.45046	1.51955
1.70771	2.0001	2.20646	1.49646
2.56635	1.54389		1.25798
2.02225	2.27063
1.78609	2.00822
2.47166	1.86916
3.372	1.71105
	3.77656
	3.43335
	2.88432
	2.81248
	3.31034
	3.93171
	2.73297
	2.17819
