# Supplementary material for: The evolutionary modifications of a GoLoco motif in the AGS protein facilitate micromere formation in the sea urchin embryo
Source: eLife. 2024 Dec 23;13:RP100086. doi: 10.7554/eLife.100086 (PMC11666239; doi:10.7554/eLife.100086)
Supplement: Figure 2—source data 3. [file elife-100086-fig2-data3.xlsx]

## Sheet: Sheet1
Figure 2 - Source Data 3
Figure 2F: Percentage of embryos with micromere-like cells at the 16~32-cell stage
Fig2F
Control	AGS-F1	AGS-F2	AGS-F3
100	100	83.33	0
25	100	0	25
100	60	0	0
85.71	100	0	0
