# Supplementary material for: The evolutionary modifications of a GoLoco motif in the AGS protein facilitate micromere formation in the sea urchin embryo
Source: eLife. 2024 Dec 23;13:RP100086. doi: 10.7554/eLife.100086 (PMC11666239; doi:10.7554/eLife.100086)
Supplement: Figure 2—source data 4. [file elife-100086-fig2-data4.xlsx]

## Sheet: Sheet1
Figure 2 - Source Data 4
Figure 2H: Proportion of embryos developed to pluteus stage relative to Full AGS control
Fig2H
Control	Full AGS	AGS-F1	AGS-F2	AGS-F3
1.1576	1.00002	0.821068	0.395264	0.0332263
1.25129	1.00008	0.192322	0.473409	0
