# Supplementary material for: The evolutionary modifications of a GoLoco motif in the AGS protein facilitate micromere formation in the sea urchin embryo
Source: eLife. 2024 Dec 23;13:RP100086. doi: 10.7554/eLife.100086 (PMC11666239; doi:10.7554/eLife.100086)
Supplement: Figure 3—source data 1. [file elife-100086-fig3-data1.xlsx]

## Sheet: Sheet1
Figure 3 - Source Data 1
Figure 3D: Vegetal cortical localization at 16~32-cell stage
Fig3D	Percentage of embryos with vegetal cortical localization
Full AGS	AGSΔGL1	AGSΔGL2	AGSΔGL3	AGSΔGL4	AGSΔGL1-4
50	0	80	33	100	0
100	25	46	10	50	30
100	10	63	22	50	33
65	12			67	21
50
50
Fig3D	Vegetal cortex:Animal cortex mean intensity ratio
Full AGS	AGSΔGL1	AGSΔGL2	AGSΔGL3	AGSΔGL4	AGSΔGL1-4
2.05427	1.23711	1.25591	1.25423	1.26389	0.938192
1.80142	0.615681	0.947095	0.67187	2.45238	0.769544
2.05983	0.789519	1.00861	0.699654	1.40625	1.54
1.85867	0.749251	2.62503	2.02917	2.72619	0.755556
	0.858863	2.12706	1.11441	2.25	0.75
	0.847291	2.34596	1.44926	2.25	0.971087
	0.769912	1.54926	1.40623	2.42857	1.07177
	0.8125	2.29861	0.378479	2.58333
	0.786702	1.68182	1.94349	2.58333
	1.52923	2.15	1.94699
	1.33582		0.828701
	0.866667		1.1229
	0.730769
	0.869927
