# Supplementary material for: The evolutionary modifications of a GoLoco motif in the AGS protein facilitate micromere formation in the sea urchin embryo
Source: eLife. 2024 Dec 23;13:RP100086. doi: 10.7554/eLife.100086 (PMC11666239; doi:10.7554/eLife.100086)
Supplement: Figure 3—source data 2. [file elife-100086-fig3-data2.xlsx]

## Sheet: Sheet1
Figure 3 - Source Data 2
Figure 3F: Proportion of embryos with micromeres at 16~32-cell stage relative to Full AGS control
Fig3F
Full AGS + MO	MO only	AGSΔGL1 + MO	AGSΔGL2 + MO	AGSΔGL3 + MO	AGSΔGL4 + MO
1	0.384656	0.604007	0.814659	0.804113	0.783549
1	0.489595	0.416783	0.7579	0.72825	0.879014
1	0.545454	0.562611	0.934072	0.781431	0.668579
