# Supplementary material for: The evolutionary modifications of a GoLoco motif in the AGS protein facilitate micromere formation in the sea urchin embryo
Source: eLife. 2024 Dec 23;13:RP100086. doi: 10.7554/eLife.100086 (PMC11666239; doi:10.7554/eLife.100086)
Supplement: Figure 3—source data 3. [file elife-100086-fig3-data3.xlsx]

## Sheet: Sheet1
Figure 3 - Source Data 3
Figure 3H: Proportion of embryos developed to pluteus stage relative to Full AGS control
Fig3H
Full AGS + MO	MO only	AGSΔGL1 + MO	AGSΔGL2 + MO	AGSΔGL3 + MO	AGSΔGL4 + MO
1	0.166608	0.0936297	0.724011	0.477249
1	0.212644	0.767241	0.960649	0.9341	0.790675
1	0.0495479	0.514536	0.753219	0.578853	0.284637
1	0.809592	0.686968	0.994228	0.823691	0.770174
