# Supplementary material for: The evolutionary modifications of a GoLoco motif in the AGS protein facilitate micromere formation in the sea urchin embryo
Source: eLife. 2024 Dec 23;13:RP100086. doi: 10.7554/eLife.100086 (PMC11666239; doi:10.7554/eLife.100086)
Supplement: Figure 4—source data 1. [file elife-100086-fig4-data1.xlsx]

## Sheet: Sheet1
Figure 4 - Source Data 1
Figure 4C: Vegetal cortical localization at the 16~32-cell stage
Fig4C	Vegetal cortex:Animal cortex mean intensity ratio
Full AGS	AGS1111	AGS2222	AGS2134	AGS4234
2.52775	0.756757	1.03846	2.8507	1.50847
2.45	0.583315	1.582	3.98841	2.15493
2.17611	1.05535	1.00613	1.39431	2.05063
1.83658	1.31416	1.08081	4.16811	1.48276
2.24885	1.09065	2.55708	1.27983	1.51765
1.36092	1.15648	1.07453	2.44655	1.54216
1.63447	1.0786	1.36735	2.5641	1.74177
3.18979	1.65406	1.92713	1.88889	2.27614
3.52703	0.85417	0.805714	1.58824	2.16049
1.6973	1.01168	2.3946	1.98848	1.94264
2.30769	1.25581	2.2067	1.41176	1.61278
2.29362	1.55952	0.722892
2.21473	1.575	1.54667
1.78142	1.28079	1.55277
1.77526	0.7973	1.37006
1.40566
