# Supplementary material for: The evolutionary modifications of a GoLoco motif in the AGS protein facilitate micromere formation in the sea urchin embryo
Source: eLife. 2024 Dec 23;13:RP100086. doi: 10.7554/eLife.100086 (PMC11666239; doi:10.7554/eLife.100086)
Supplement: Figure 4—source data 2. [file elife-100086-fig4-data2.xlsx]

## Sheet: Sheet1
Figure 4 - Source Data 2
Figure 4D: Proportion of embryos with micromeres at the 16~32-cell stage relative Full AGS control
Fig4D
Full AGS + MO	MO Only	AGS1111 + MO	AGS2222 + MO	AGS2134 + MO	AGS4234 + MO
1	0.581824	0.742754	0.297101	0.434783	0.31755
1	0.657754	0.187582	0.339779	1.29116	0.99067
1	0.844526	0.18014	0.555242	1.10883	0.991811
1	0.398107	0.0404971	0.134174	0.157302	0.312778
1	0.213277	0.0132712	0.0682734	0.514948	0.637683
