# Supplementary material for: The evolutionary modifications of a GoLoco motif in the AGS protein facilitate micromere formation in the sea urchin embryo
Source: eLife. 2024 Dec 23;13:RP100086. doi: 10.7554/eLife.100086 (PMC11666239; doi:10.7554/eLife.100086)
Supplement: Figure 4—source data 3. [file elife-100086-fig4-data3.xlsx]

## Sheet: Sheet1
Figure 4 - Source Data 3
Figure 4F: Proportion of embryos developed to pluteus stage relative to Full AGS control
Fig4F
Full AGS + MO	MO Only	AGS1111 + MO	AGS2222 + MO	AGS2134 + MO	AGS4234 + MO
1	0.650246	0.962099	0.968407	0.846774	0.918367
1	0.61266	0.819774	0.915677	1.01309	0.924759
1	0.77269	0.245739	0.240921	0.546863	0.754936
1	0.715224	0.0590338	0.144977	0.863112	0.850379
1	0.619286	0.556961	0.540987	1.16024	0.863578
