# Supplementary material for: The evolutionary modifications of a GoLoco motif in the AGS protein facilitate micromere formation in the sea urchin embryo
Source: eLife. 2024 Dec 23;13:RP100086. doi: 10.7554/eLife.100086 (PMC11666239; doi:10.7554/eLife.100086)
Supplement: Figure 4—source data 4. [file elife-100086-fig4-data4.xlsx]

## Sheet: Sheet1
Figure 4 - Source Data 4
Figure 4I: Vegetal cortical localization
Fig4I	Percentage of embryos with vegetal cortical localization
Full AGS	AGS4444	AGS-GL1GL2
92.54	85.11	34.88
93.33	76.06	23.61
Fig4I	Vegetal cortex:Animal cortex mean intensity ratio
Full AGS	AGS4444	AGS-GL1GL2
1.66159	1.73492	1.62832
1.93901	1.39199	0.851048
2.76978	2.64205	1.89354
2.20569	2.66105	1.19157
2.76875	2.65188	1.72695
1.89545	1.99092	0.600004
2.02432	1.97225	1.32927
1.55644	2.11222	0.697368
1.70291	2.5872	1.70505
1.2154	3.4902	1.73461
		1.67466
