# Supplementary material for: The evolutionary modifications of a GoLoco motif in the AGS protein facilitate micromere formation in the sea urchin embryo
Source: eLife. 2024 Dec 23;13:RP100086. doi: 10.7554/eLife.100086 (PMC11666239; doi:10.7554/eLife.100086)
Supplement: Figure 4—source data 5. [file elife-100086-fig4-data5.xlsx]

## Sheet: Sheet1
Figure 4 - Source Data 5
Figure 4J: Proportion of embryos with micromere at the 16~32-cell stage relative to Full AGS control
Fig4J
Full AGS + MO	MO Only	AGS4444 + MO	AGS-GL1GL2 + MO
1	0.489821	0.84963	0.977618
1	0.708395	0.846621	0.533434
1	0.512672	0.815166	0.820833
1	0.666667		0.619529
1	0.545231		0.668572
1	0.663632		0.739107
1	0.651451
