# Supplementary material for: The evolutionary modifications of a GoLoco motif in the AGS protein facilitate micromere formation in the sea urchin embryo
Source: eLife. 2024 Dec 23;13:RP100086. doi: 10.7554/eLife.100086 (PMC11666239; doi:10.7554/eLife.100086)
Supplement: Figure 4—source data 6. [file elife-100086-fig4-data6.xlsx]

## Sheet: Sheet1
Figure 4 - Source Data 6
Figure 4K: Proportion of embryos developed to pluteus stage relative to Full AGS control
Fig4K
Full AGS + MO	MO Only	AGS4444 + MO	AGS-GL1GL2 + MO
1	0.64143	1.03297	0.61709
1	0.47585	0.85107	0.44409
1	0.3702	0.347971	0.21075
1	0.55899		0.538063
1	0.541978
