# Supplementary material for: The evolutionary modifications of a GoLoco motif in the AGS protein facilitate micromere formation in the sea urchin embryo
Source: eLife. 2024 Dec 23;13:RP100086. doi: 10.7554/eLife.100086 (PMC11666239; doi:10.7554/eLife.100086)
Supplement: Figure 5—figure supplement 1—source data 1. [file elife-100086-fig5-figsupp1-data1.xlsx]

## Sheet: Sheet1
Figure 5 Supplement 1 - Source Data 1
Figure 5 Supplement 1D: Vegetal cortical localization at 16~32-cell stage
Figure 5 Supplement 1D	Proportion of embryos with vegetal cortical localization relative to SpAGS control
SpAGS	SbAGS
1	0.75
1	0.690789
1	0.755556
1	0.333333
Figure 5 Supplement 1D	Vegetal cortex:Animal cortex mean intensity ratio
SpAGS	SbAGS
1.80159	1.75802
1.02737	1.87359
1.54945	1.5102
2.11538	2.57396
1.5266	1.32877
1.12195	1.6129
2.37884	2.09536
1.96484	2.56731
1.36891	1.27009
3	1.35577
1.18452	1.55357
3.79592	1.62322
1.28571	1.4359
1.40386	1.549
2.05123	1.31731
2.31618	2.03404
2.62162	2.28115
2.0443	1.31558
2.20482	1.71761
2.01448	1.3294
1.76744	2.12344
2.32889	1.64085
2.75439	1.99343
4.375	3.67391
1.56449	2.32172
3.0833	2.25
2.02018	1.94097
2.61587	1.50267
1.48148	0.882956
3.22066	1.62563
2.34591	1.41174
1.96519	2.43688
2.24496	1.51442
1.70833	1.40722
4.03904
