# Supplementary material for: The evolutionary modifications of a GoLoco motif in the AGS protein facilitate micromere formation in the sea urchin embryo
Source: eLife. 2024 Dec 23;13:RP100086. doi: 10.7554/eLife.100086 (PMC11666239; doi:10.7554/eLife.100086)
Supplement: Figure 5—figure supplement 2—source data 1. [file elife-100086-fig5-figsupp2-data1.xlsx]

## Sheet: Sheet1
Figure 5 Supplement 2 - Source Data 1
Figure 5 Supplement 2D: Vegetal cortical localization at 16~32-cell stage
Figure 5 Supplement 2D	Percentage of embryos with vegetal cortical localization
Full AGS	AGS_S389A	AGS_AGS3GL_3S/A	AGS_AGS3GL_GL2GL3
94.87	81.58	84.44	97.14
97.44	83.02	84.75	95.95
Figure 5 Supplement 2D	Vegetal cortex:Animal cortex mean intensity ratio
Full AGS	AGS_S389A	AGS_AGS3GL_3S/A	AGS_AGS3GL_GL2GL3
2.42982	1.00833	2.81169	1.73074
2.01106	2.27018	2.02247	4.15171
1.70732	1.3917	1.0685	2.81818
2.94393	2.99456	2.42304	1.71795
3.26316	3.375	2.76694	3.80263
1.54883	1.67416	1.18681	3.09909
4.06465	1.63156	2.18367	2.37762
3.3835	2.00004	4.10371	2.15899
3.94737	1.88406	1.69603
4.14625	2.41071	2.35368
2.87958	2.3133	1.07648
3.84746	3.31673	2.57229
3.508	1.78124	0.991887
3.62121	2.16149	2.93846
3.56462		3.23581
		2.76667
