# Supplementary material for: The evolutionary modifications of a GoLoco motif in the AGS protein facilitate micromere formation in the sea urchin embryo
Source: eLife. 2024 Dec 23;13:RP100086. doi: 10.7554/eLife.100086 (PMC11666239; doi:10.7554/eLife.100086)
Supplement: Figure 5—figure supplement 2—source data 2. [file elife-100086-fig5-figsupp2-data2.xlsx]

## Sheet: Sheet1
Figure 5 Supplement 2 - Source Data 2
Figure 5 Supplement 2E: Proportion of embryos with micromeres at the 16~32-cell stage relative to Full AGS control
Figure 5 Supplement 2E
Full AGS + MO	MO Only	AGS_S389A + MO	AGS_AGS3GL_3S/A + MO	AGS_AGS3GL_GL2GL3 + MO	AGS_AGS3GL + MO
1	0.33159	0.309436	0.435193	0.751062	0.42606
1	0.557222	0.724532	0.686819	0.905293	0.66093
1	0.445561	0.61623	0.612434	0.900443	0.659967
		0.493012			0.631868
