# Supplementary material for: The evolutionary modifications of a GoLoco motif in the AGS protein facilitate micromere formation in the sea urchin embryo
Source: eLife. 2024 Dec 23;13:RP100086. doi: 10.7554/eLife.100086 (PMC11666239; doi:10.7554/eLife.100086)
Supplement: Figure 5—figure supplement 2—source data 3. [file elife-100086-fig5-figsupp2-data3.xlsx]

## Sheet: Sheet1
Figure 5 Supplement 2 - Source Data 3
Figure 5 Supplement 2F: Proportion of embryos developing to pluteus stage relative to Full AGS control
Figure 5 Supplement 2F
Full AGS + MO	MO Only	AGS_S389A + MO	AGS_AGS3GL_3S/A + MO	AGS_AGS3GL_GL2GL3 + MO	AGS_AGS3GL + MO
1	0.614706	0.824401	0.776052	0.76874	0.46264
1	0.856985	0.858202	0.855198	1.05957	0.595807
1	0.546342	0.495746	0.371743	0.865683	0.744848
1	0.420219	0.826449	0.717833	1.04783	0.744917
		0.59485			0.612386
