# Supplementary material for: The evolutionary modifications of a GoLoco motif in the AGS protein facilitate micromere formation in the sea urchin embryo
Source: eLife. 2024 Dec 23;13:RP100086. doi: 10.7554/eLife.100086 (PMC11666239; doi:10.7554/eLife.100086)
Supplement: Figure 5—figure supplement 2—source data 4. [file elife-100086-fig5-figsupp2-data4.xlsx]

## Sheet: Sheet1
Figure 5 Supplement 2 - Source Data 4
Figure 5 Supplement 2I: Vegetal cortical localization at the 16~32-cell stage
Figure 5 Supplement 2I	Proportion of embryos with vegetal cortical localization relative to SpAGS
SpAGS	PmAGS	PmAGS-SpLinker
1	0.458333	0.458333
1	0.147929	0
1	0.527778	0.571429
Figure 5 Supplement 2I	Vegetal cortex:Animal cortex mean intensity ratio
SpAGS	PmAGS	PmAGS-SpLinker
2.23236	1.78144	1.03568
2.59417	0.662042	0.808148
2.4918	2.82759	1.5797
2.34568	0.80588	1.59524
1.64031	0.934906	1.89231
2.64811	2.13214	1.41731
2.41664	2.05556	1.92
3.0924	1.15837	1.41957
3.76493	1.94231	1.83333
1.95385	0.989796	2.45455
2.35399	0.739432	0.730723
2.23404	1.23361	1.36362
4.2	1.93495	1.15672
2.41912	1.87821	1.27562
	2.77273	2.23469
	2.57014	2.31159
	2.57955	2.86944
	1.00275	1.42502
	0.772177	3.33333
	2.11209	2.10462
		1.62951
		1.74921
