# Supplementary material for: The evolutionary modifications of a GoLoco motif in the AGS protein facilitate micromere formation in the sea urchin embryo
Source: eLife. 2024 Dec 23;13:RP100086. doi: 10.7554/eLife.100086 (PMC11666239; doi:10.7554/eLife.100086)
Supplement: Figure 5—figure supplement 2—source data 5. [file elife-100086-fig5-figsupp2-data5.xlsx]

## Sheet: Sheet1
Figure 5 Supplement 2 - Source Data 5
Figure 5 Supplement 2J: Proportion of embryos with micromeres at the 16~32-cell stage relative to SpAGS control
Figure 5 Supplement 2J
SpAGS+MO	MO only	PmAGS+MO	SpAGS-PmGL+MO	PmAGS-SpLinker+MO
1	0.419043	0.620662	0.391376	0.681753
1	0.472333	0.461868	0.638409	0.515665
1	0.264828	0.305455	0.751304	0.24
