# Supplementary material for: The evolutionary modifications of a GoLoco motif in the AGS protein facilitate micromere formation in the sea urchin embryo
Source: eLife. 2024 Dec 23;13:RP100086. doi: 10.7554/eLife.100086 (PMC11666239; doi:10.7554/eLife.100086)
Supplement: Figure 5—figure supplement 2—source data 6. [file elife-100086-fig5-figsupp2-data6.xlsx]

## Sheet: Sheet1
Figure 5 Supplement 2 - Source Data 6
Figure 5 Supplement 2K: Proportion of embryos developing to pluteus stage relative to SpAGS control
Figure 5 Supplement 2K
SpAGS+MO	MO only	PmAGS+MO	SpAGS-PmGL+MO	PmAGS-SpLinker+MO
1	0.601343	0.400748	0.441128	0.380599
1	0.64591	0.609859	0.230492	0.363261
