# Supplementary material for: The evolutionary modifications of a GoLoco motif in the AGS protein facilitate micromere formation in the sea urchin embryo
Source: eLife. 2024 Dec 23;13:RP100086. doi: 10.7554/eLife.100086 (PMC11666239; doi:10.7554/eLife.100086)
Supplement: Figure 5—source data 1. [file elife-100086-fig5-data1.xlsx]

## Sheet: Sheet1
Figure 5 - Source Data 1
Figure 5C: Vegetal cortical localization at the 16~32-cell stage
Fig5C	Percentage of embryos with vegetal cortical localization
SpAGS	EtAGS	PmAGS
96.72	93.51	35.48
95.96	92.44	28.36
Fig5C	Vegetal cortex:Animal cortex mean intensity ratio
SpAGS	EtAGS	PmAGS
2.4135	1.67346	1.25
1.83154	3.43126	1.39252
4.98548	3.79539	1.725
3.03226	1.38521	1.17533
1.86364	2.36735	1.31747
3.52381	1.8991	1.15885
2.14493	2.76665	2.32081
1.9188	1.90449	1.61905
2.53247	2.63765	1.05156
2.20253	1.54023	1.96512
3.18954	3.57534	1.12987
3.21981	2.41463	2.25457
3.12198	2.22895	1.71271
3.315	2.11007	1.26666
3		1.18634
2.39726		1.42199
