# Supplementary material for: The evolutionary modifications of a GoLoco motif in the AGS protein facilitate micromere formation in the sea urchin embryo
Source: eLife. 2024 Dec 23;13:RP100086. doi: 10.7554/eLife.100086 (PMC11666239; doi:10.7554/eLife.100086)
Supplement: Figure 5—source data 2. [file elife-100086-fig5-data2.xlsx]

## Sheet: Sheet1
Figure 5 - Source Data 2
Figure 5D: Proportion of embryos with micromeres at the 16~32-cell stage relative to SpAGS control
Fig5D
SpAGS + MO	MO Only	EtAGS + MO	PmAGS + MO
1	0.658893	0.728543	0.616272
1	0.617478	0.884116	0.706205
