# Supplementary material for: The evolutionary modifications of a GoLoco motif in the AGS protein facilitate micromere formation in the sea urchin embryo
Source: eLife. 2024 Dec 23;13:RP100086. doi: 10.7554/eLife.100086 (PMC11666239; doi:10.7554/eLife.100086)
Supplement: Figure 5—source data 3. [file elife-100086-fig5-data3.xlsx]

## Sheet: Sheet1
Figure 5 - Source Data 3
Figure 5E: Proportion of embryos developed to pluteus stage relative to SpAGS control
Fig5E
SpAGS + MO	MO Only	EtAGS + MO	PmAGS + MO
1	0.541978	0.636464	0.233281
1	0.199241	0.625795	0.293069
1	0.756985	1.04259
