# Supplementary material for: The evolutionary modifications of a GoLoco motif in the AGS protein facilitate micromere formation in the sea urchin embryo
Source: eLife. 2024 Dec 23;13:RP100086. doi: 10.7554/eLife.100086 (PMC11666239; doi:10.7554/eLife.100086)
Supplement: Figure 5—source data 4. [file elife-100086-fig5-data4.xlsx]

## Sheet: Sheet1
Figure 5 - Source Data 4
Figure 5H: Vegetal cortical localization at the 16~32-cell stage
Fig5H	Percentage of embryos with vegetal cortical localization
Full AGS	AGS-DmGL	AGS-PmGL	AGS-EtGL	AGS-AGS3GL	AGS-LGNGL
92.54	91.53	72.09	64.71	47.54	91.84
93.33	88.51	79.35	82.8	51.81	95.83
Fig5H	Vegetal cortex:Animal cortex mean intensity ratio
Full AGS	AGS-DmGL	AGS-PmGL	AGS-EtGL	AGS-AGS3GL	AGS-LGNGL
2.85911	3.48333	2.86287	1.78777	1.50329	3.65728
2.4081	1.53401	1.44785	4.47411	1.20916	1.69737
2.65625	2.02364	1.81729	3.13787	2.02591	3.58182
2.82022	1.9875	4.30667	4.14141	1.71894	4.45634
2.60784	3.48611	1.31395	4.07	1.2	2.89583
1.74555	2.9491	5.33695	2.2625	1.5725	2.28455
2.33081	2.94265	1.6599	2.00748	1.88636	2.67513
3.00826	4.13071	2.01787	2.27273	1.09394	2.71058
3.30108	3.14783	2.48125	3.5814	1.47454	2.8827
2.3681	3.72619	2.0813	1.88206	1.11196	1.50633
3.44146	1.09008	2.54082	2.81219	1.97826	4.02439
1.93067	3.15447	3.84906	1.96182	1.87464	3.98795
1.76667		1.99994	1.50004	1.12727	3.89353
		2.77113	1.81134	1.76543	3.43292
		4.43243		1.69128	3.44
		3.87729		2.19143	4.08824
		2.38938		2
		3.26316		2.1875
				2.09371
				1.38021
