# Supplementary material for: The evolutionary modifications of a GoLoco motif in the AGS protein facilitate micromere formation in the sea urchin embryo
Source: eLife. 2024 Dec 23;13:RP100086. doi: 10.7554/eLife.100086 (PMC11666239; doi:10.7554/eLife.100086)
Supplement: Figure 5—source data 5. [file elife-100086-fig5-data5.xlsx]

## Sheet: Sheet1
Figure 5 - Source Data 5
Figure 5I: Proportion of embryos with micromeres at the 16~32-cell stage relative to Full AGS control
Fig5I
Full AGS + MO	MO Only	AGS-DmGL + MO	AGS-PmGL + MO	AGS-EtGL + MO	AGS-AGS3GL + MO	AGS-LGNGL + MO
1	0.489821	0.582775	0.631	0.934221	0.645277	0.968918
1	0.708395	0.820966	0.606947	0.801231	0.504	0.935314
1	0.512672				0.728972	1.00131
1	0.666667
