# Supplementary material for: The evolutionary modifications of a GoLoco motif in the AGS protein facilitate micromere formation in the sea urchin embryo
Source: eLife. 2024 Dec 23;13:RP100086. doi: 10.7554/eLife.100086 (PMC11666239; doi:10.7554/eLife.100086)
Supplement: Figure 5—source data 6. [file elife-100086-fig5-data6.xlsx]

## Sheet: Sheet1
Figure 5 - Source Data 6
Figure 5J: Proportion of embryos developed to pluteus stage relative to Full AGS control
Fig5J
Full AGS + MO	MO Only	AGS-DmGL + MO	AGS-PmGL + MO	AGS-EtGL + MO	AGS-AGS3GL + MO	AGS-LGNGL + MO
1	0.64143	0.949062	0.762784	1.12106	0.630664	0.940171
1	0.47585	0.723241	0.501661	0.931129	0.768011	0.881018
1	0.3702				0.526381	0.867304
1	0.55899
