# Supplementary material for: The evolutionary modifications of a GoLoco motif in the AGS protein facilitate micromere formation in the sea urchin embryo
Source: eLife. 2024 Dec 23;13:RP100086. doi: 10.7554/eLife.100086 (PMC11666239; doi:10.7554/eLife.100086)
Supplement: Figure 7—source data 1. [file elife-100086-fig7-data1.xlsx]

## Sheet: Sheet1
Figure 7 - Source Data 1
Figure 7D: Insc enrichment in micromeres
Fig7D
Control MO	AGS MO
1	0.204082
1	0.24359
