# Supplementary material for: The evolutionary modifications of a GoLoco motif in the AGS protein facilitate micromere formation in the sea urchin embryo
Source: eLife. 2024 Dec 23;13:RP100086. doi: 10.7554/eLife.100086 (PMC11666239; doi:10.7554/eLife.100086)
Supplement: Figure 7—source data 2. [file elife-100086-fig7-data2.xlsx]

## Sheet: Sheet1
Figure 7 - Source Data 2
Figure 7F: NuMA enrichment in micromeres
Fig7F
Control MO	AGS MO
1	0.0966387
1	0.484615
1	0.375
