# Supplementary material for: The evolutionary modifications of a GoLoco motif in the AGS protein facilitate micromere formation in the sea urchin embryo
Source: eLife. 2024 Dec 23;13:RP100086. doi: 10.7554/eLife.100086 (PMC11666239; doi:10.7554/eLife.100086)
Supplement: Figure 8—source data 1. [file elife-100086-fig8-data1.xlsx]

## Sheet: Sheet1
Figure 8 - Source Data 1
Figure 8B: Proportion of embryos with the normal expression pattern relative to control MO
Fig8B
Wnt8 10hpf			Wnt8 1dpf			FoxA 1dpf			Blimp1b 1dpf			Endo16 1dpf
Control MO	AGS MO		Control MO	AGS MO		Control MO	AGS MO		Control MO	AGS MO		Control MO	AGS MO
1	0.784314		1	0		1	0.742706		1	0.786492		1	0.225
1	0.776471		1	0.235714		1	0.653846		1	0.607639		1	0.36036
			1	0.294074		1	0.253333		1	0		1	0.485934
						1	0.301932		1	0.424242
Ets1 1dpf			Alx 1dpf			Tbr1 1dpf			Sm50 1dpf			FoxQ2 1dpf
Control MO	AGS MO		Control MO	AGS MO		Control MO	AGS MO		Control MO	AGS MO		Control MO	AGS MO
1	1		1	1.08387		1	0.101961		1	0.72		1	1.04464
1	0.0355277		1	0.8867		1	1.05376		1	0.59699		1	1.13671
1	1.54545		1	0.588235		1	0.957983					1	0.936652
1	1.12088
