# Supplementary material for: The evolutionary modifications of a GoLoco motif in the AGS protein facilitate micromere formation in the sea urchin embryo
Source: eLife. 2024 Dec 23;13:RP100086. doi: 10.7554/eLife.100086 (PMC11666239; doi:10.7554/eLife.100086)
Supplement: Figure 9—source data 1. [file elife-100086-fig9-data1.xlsx]

## Sheet: Sheet1
Figure 9 - Source Data 1
Figure 9D: Vegetal cortical localization at 16~32-cell stage
Fig9D	Proportion of embryos with vegetal cortical localization relative to GFP-SpDlg
GFP-SpDlg	GFP-PmDlg
1	0.961735
1	1.02315
Fig9D	Vegetal cortex:Animal cortex mean intensity ratio
GFP-SpDlg	GFP-PmDlg
2.25785	2.86338
2.22093	1.49651
2.06481	1.59259
2.26056	1.82166
1.46386	1.82796
2.57926	1.5536
2.36957	1.43421
2.02042	1.19444
1.58519
1.39932
2.03497
