# Supplementary material for: The evolutionary modifications of a GoLoco motif in the AGS protein facilitate micromere formation in the sea urchin embryo
Source: eLife. 2024 Dec 23;13:RP100086. doi: 10.7554/eLife.100086 (PMC11666239; doi:10.7554/eLife.100086)
Supplement: Figure 9—source data 2. [file elife-100086-fig9-data2.xlsx]

## Sheet: Sheet1
Figure 9 - Source Data 2
Figure 9F: Vegetal cortical localization at 16~32-cell stage
Fig9F	Proportion of embryos with vegetal cortical localization relative to GFP-SpDlg
GFP-SpInsc	GFP-EtInsc	GFP-PmInsc
1	0.859504	0.909091
1	0.899654	1.17647
Fig9F	Vegetal cortex:Animal cortex mean intensity ratio
GFP-SpInsc	GFP-EtInsc	GFP-PmInsc
1.4	1.97333	1.45012
1.04762	1.53922	1.88976
1.48235	1.46923	1.74265
1.48148	2.19657	1.50705
2.14029	1.8046	1.84
1.91667	1.94172	1.43529
1.5	1.84775	1.32051
2.01299	1.46154	1.55738
1.92121	1.53036	2.28986
1.7381	1.07982	1.73859
1.93936	1.63743	1.8589
1.84913	1.66247	1.46536
1.60393
1.22825
