# Supplementary material for: The evolutionary modifications of a GoLoco motif in the AGS protein facilitate micromere formation in the sea urchin embryo
Source: eLife. 2024 Dec 23;13:RP100086. doi: 10.7554/eLife.100086 (PMC11666239; doi:10.7554/eLife.100086)
Supplement: Figure 10—source data 1. [file elife-100086-fig10-data1.xlsx]

## Sheet: Sheet1
Figure 10 - Source Data 1
Figure 10B: Percentage of embryos with micromeres cells at 4hpf
Fig10B
Vasa-mCh only	GFP-SpAGS+Vasa-mCh	GFP-EtAGS+Vasa-mCh	GFP-PmAGS+Vasa-mCh
17.2727	33.6634	18.2692	13.5922
11.3043	30	13.6364	14.1593
7.27273	24.7525	7.56303	11.8182
