# Supplementary material for: The evolutionary modifications of a GoLoco motif in the AGS protein facilitate micromere formation in the sea urchin embryo
Source: eLife. 2024 Dec 23;13:RP100086. doi: 10.7554/eLife.100086 (PMC11666239; doi:10.7554/eLife.100086)
Supplement: Figure 10—source data 2. [file elife-100086-fig10-data2.xlsx]

## Sheet: Sheet1
Figure 10 - Source Data 2
Figure 10D: Percentage of embryos with Vasa enrichment in micromere-like cells at 4hpf
Fig10D
Vasa-mCh only	GFP-SpAGS+Vasa-mCh	GFP-EtAGS+Vasa-mCh	GFP-PmAGS+Vasa-mCh
33.3333	80	46.1538	28.5714
53.8462	81.25	60	50
35.7143	73.6842	33.3333	38.8889
