# Supplementary material for: The evolutionary modifications of a GoLoco motif in the AGS protein facilitate micromere formation in the sea urchin embryo
Source: eLife. 2024 Dec 23;13:RP100086. doi: 10.7554/eLife.100086 (PMC11666239; doi:10.7554/eLife.100086)
Supplement: Figure 10—source data 3. [file elife-100086-fig10-data3.xlsx]

## Sheet: Sheet1
Figure 10 - Source Data 3
Figure 10E: Percentage of embryos with co-enrichment of Vasa ans AGS in micromere-like cells
Fig10E
GFP-SpAGS+Vasa-mCh	GFP-EtAGS+Vasa-mCh	GFP-PmAGS+Vasa-mCh
80	50	36.3636
86.6667	64.2857	50
73.6842	33.3333	43.75
