# Supplementary material for: The evolutionary modifications of a GoLoco motif in the AGS protein facilitate micromere formation in the sea urchin embryo
Source: eLife. 2024 Dec 23;13:RP100086. doi: 10.7554/eLife.100086 (PMC11666239; doi:10.7554/eLife.100086)
Supplement: Figure 10—source data 4. [file elife-100086-fig10-data4.xlsx]

## Sheet: Sheet1
Figure 10 - Source Data 4
Figure 10G: Percentage of embryos with Vasa enrichment in germ cells
Fig10G	%Embryos with Vasa enrichment in germ cells
Vasa-mCh only	GFP-SpAGS+Vasa-mCh	GFP-EtAGS+Vasa-mCh	GFP-PmAGS+Vasa-mCh
13.3333	20.8333	10.5263	9.09091
0	46.1538	13.3333	4.16667
0	8.33333	15.3846	9.52381
